# Supplementary material for: Performance and Deployment of Low-Cost Particle Sensor Units to Monitor Biomass Burning Events and Their Application in an Educational Initiative
Source: MDPI journal article supplement (doi:10.3390/s21217206), 2021-10-29
Supplement: s1 [file s1]

# Performance and Deployment of Low-Cost Particle Sensor Units to Monitor Biomass Burning Events and Their Application in an Educational Initiative

Fabienne Reisen <sup>1,\*</sup>, Jacinta Cooper <sup>1</sup>, Jennifer C. Powell <sup>1</sup>, Chris Roulston <sup>1</sup> and Amanda J. Wheeler <sup>2,3</sup>

**Table S1.** Deployment details of field-based measurements.

| Location             | Sampling period    | Season               | SMOG<br>units | High grade instrument | Temperature (°C)<br>Average (range) | Relative Humidity (%)<br>Average (range) |
|----------------------|--------------------|----------------------|---------------|-----------------------|-------------------------------------|------------------------------------------|
| Aspendale, Victoria  | 23-26 Apr 2018     | Autumn               | 3             | E-sampler, Fidas      | 21 (15-29)                          | 71 (19-92)                               |
| Aspendale, Victoria  | 25 Jun-16 Jul 2018 | Winter               | 1             | E-sampler, Fidas      | 14 (5-21)                           | 59 (21-80)                               |
| NE Victoria          | 1 May-6 Jun 2018   | Autumn/Winter        | 30            | NA                    | NA                                  | NA                                       |
| Rutherglen, Victoria | 1 May-6 Jun 2018   | Autumn/Winter        | 2             | E-sampler             | 13 (6-29)                           | 59 (23-85)                               |
| NE Victoria          | Nov 2018-Jun 2019  | Summer/Autumn/Winter | 12            | NA                    | NA                                  | NA                                       |
| Alexandra, Victoria  | Nov 2018-Feb 2019  | Summer               | 1             | E-sampler, Fidas      | 22.5 (5-43)                         | 58 (9-98)                                |
| Alexandra, Victoria  | Mar/Apr 2019       | Autumn               | 1             | E-sampler, Fidas      | 16.3 (2-38)                         | 64 (13-98)                               |
| Alexandra, Victoria  | May/Jun 2019       | Winter               | 1             | E-sampler, Fidas      | 10.0 (1-21)                         | 86 (38-100)                              |

**Table S2.** Data analysis parameters and equations

| Statistical indicator                           | Definition                                                                                                                                                                                                                                                   |
|-------------------------------------------------|--------------------------------------------------------------------------------------------------------------------------------------------------------------------------------------------------------------------------------------------------------------|
| Root mean square error (RMSE)                   | $RMSE = \left( \frac{\sum (Ref_i - Sensor)^2}{n} \right)^{1/2}$                                                                                                                                                                                              |
| Normalised Root mean square error (NRMSE)       | $NRMSE = \frac{RMSE}{Ref}$                                                                                                                                                                                                                                   |
| Relative bias                                   | $Bias (\%) = \frac{Sensor - Ref}{Ref} \times 100\%$                                                                                                                                                                                                          |
| Mean Absolute Error (MAE)                       | $MAE = \frac{1}{n} \sum  Ref_i - Sensor_i $                                                                                                                                                                                                                  |
| Pearson correlation coefficient r               | $r = \frac{N(\sum_{i=1}^N Sensor_i Ref_i) - (\sum_{i=1}^N Sensor_i)(\sum_{i=1}^N Ref_i)}{\sqrt{[N(\sum_{i=1}^N Sensor_i^2) - (\sum_{i=1}^N Sensor_i)^2][N(\sum_{i=1}^N Ref_i^2) - (\sum_{i=1}^N Ref_i)^2]}}$                                                 |
| Lin's Concordance Correlation Coefficient (CCC) | $\rho_c = \frac{2\rho\sigma_x\sigma_y}{\sigma_x^2 + \sigma_y^2 + (\mu_x - \mu_y)^2}, \mu_x \text{ and } \mu_y \text{ are the means, } \sigma_x^2 \text{ and } \sigma_y^2 \text{ are the variances,}$ <p><math>\rho</math> is the correlation coefficient</p> |

**Table S3.** Summary statistics of hourly PM<sub>2.5</sub> concentrations measured during the rooftop tests at CSIRO Aspendale in 2018 (QA/QC calibrated data set).(Good AQ PM<sub>2.5</sub><25 µg m<sup>-3</sup>, Fair AQ PM<sub>2.5</sub>=25-50 µg m<sup>-3</sup>, Poor AQ>50 µg m<sup>-3</sup>)

| Date       | Units        | Mean | Median | Min  | Max  | RH (%)       | %obs when<br>RH>70% | Temperature<br>(°C) | N   | <LOD<br>(%) | Good<br>AQ (%) | Fair AQ<br>(%) | Poor AQ<br>(%) |
|------------|--------------|------|--------|------|------|--------------|---------------------|---------------------|-----|-------------|----------------|----------------|----------------|
| 23-26 Apr  | SMOG2        | 7.8  | 5.9    | 0.05 | 32.8 | 55.0 (21-79) | 33.3                | 22.1 (12-41)        | 73  | 43          | 95.8           | 4.2            | 0.0            |
|            | SMOG3        | 7.5  | 6.3    | 0.9  | 31.8 | 55.1 (21-78) | 33.3                | 22.0 (13-40)        | 73  | 40          | 97.2           | 2.8            | 0.0            |
|            | SMOG4        | 8.5  | 6.8    | 0.2  | 34.0 | 53.7 (23-80) | 31.9                | 22.0 (12-42)        | 73  | 35          | 94.4           | 5.6            | 0.0            |
|            | E-sampler4   | 9.7  | 7.5    | 2.3  | 44.9 | 42.7 (22-49) | NA                  | 21.4 (15-28)        | 73  | 38          | 91.7           | 8.3            | 0.0            |
|            | E-sampler5   | 10.2 | 8.2    | 1.9  | 44.8 | 42.0 (21-49) | NA                  | 21.6 (15-29)        | 73  | 36          | 91.7           | 8.3            | 0.0            |
|            | Fidas        | 13.8 | 11.1   | 4.2  | 39.3 |              | NA                  |                     | 73  | 11          | 88.9           | 11.1           | 0.0            |
| 25Jun-4Jul | SMOG         | 14.9 | 8.0    | 0.01 | 72.4 | 57.9 (21-80) | 32.3                | 13.7 (6-37)         | 105 | 40          | 77.5           | 16.7           | 5.9            |
|            | E-sampler_CF | 8.2  | 4.8    | 0.00 | 51.3 | 45.3 (27-49) | NA                  | 13.6 (5-21)         | 212 | 55          | 93.1           | 5.9            | 1.0            |
|            | Fidas_CF     | 8.1  | 5.4    | 0.8  | 37.2 |              | NA                  |                     | 212 | 50          | 94.1           | 5.9            | 0.0            |

**Table S4** Summary statistics of hourly PM<sub>2.5</sub> concentrations measured in Northeast Victoria in 2018.(Good AQ PM<sub>2.5</sub><25 µg m<sup>-3</sup>, Fair AQ PM<sub>2.5</sub>=25-50 µg m<sup>-3</sup>, Poor AQ>50 µg m<sup>-3</sup>)

| Location              | Date       | Units               | Mean | Median | Max   | RH (%)       | %obs when<br>RH>70% | Temperature<br>(°C) | N<br>(hrs) | <LOD<br>(%) | Good<br>AQ (%) | Fair AQ<br>(%) | Poor AQ<br>(%) |
|-----------------------|------------|---------------------|------|--------|-------|--------------|---------------------|---------------------|------------|-------------|----------------|----------------|----------------|
| Rutherglen<br>region  | 1May-6June | SMOG23              | 6.3  | 4.8    | 66.0  | 49.3 (13-79) | 5.9                 | 16.7 (6-42)         | 837        | 56          | 99.4           | 0.6            | 0.0            |
|                       |            | SMOG25              | 6.4  | 4.7    | 63.0  | 47.4 (15-74) | 2.4                 | 16.3 (6-39)         | 835        | 56          | 99.2           | 0.8            | 0.0            |
|                       | 1May-6June | SMOG5*              | 3.8  | 3.0    | 15.2  | 52.1 (24-68) |                     | 14.4 (6-30)         | 794        |             |                |                |                |
|                       |            | SMOG29              | 7.1  | 5.4    | 81.0  | 56.8 (25-75) | 14.4                | 14.0 (6-29)         | 787        | 51          | 99.0           | 0.9            | 0.1            |
|                       | 1May-6June | SMOG15              | 7.1  | 5.9    | 30.7  | 57.3 (23-76) | 14.3                | 13.5 (6-30)         | 794        | 46          | 99.9           | 0.1            | 0.0            |
|                       |            | SMOG21              | 6.9  | 5.7    | 32.2  | 55.9 (22-74) | 8.9                 | 13.6 (6-31)         | 790        | 49          | 99.9           | 0.1            | 0.0            |
|                       | 1May-6June | SMOG26              | 6.3  | 4.6    | 39.9  | 49.1 (25-65) | 0                   | 14.9 (6-32)         | 799        | 60          | 99.2           | 0.8            | 0.0            |
|                       | 1 May      | SMOG27              | 10.5 | 11.0   | 12.7  | 35.5 (31-41) |                     | 18.2 (15-25)        | 7          |             |                |                |                |
|                       | 1May-6June | SMOG3               | 6.4  | 4.5    | 69.6  | 55.2 (23-73) | 4.0                 | 14.4 (6-29)         | 821        | 62          | 98.8           | 1.1            | 0.1            |
|                       |            | SMOG24              | 6.4  | 4.4    | 44.2  | 56.6 (25-75) | 9.8                 | 14.2 (6-29)         | 810        | 62          | 98.5           | 1.5            | 0.0            |
|                       | 1May-6June | SMOG1               | 9.8  | 7.3    | 93.1  | 51.7 (7-84)  | 16.1                | 16.7 (6-57)         | 830        | 37          | 95.6           | 3.2            | 1.2            |
|                       |            | SMOG30              | 10.7 | 8.2    | 98.0  | 46.0 (11-76) | 2.6                 | 16.7 (6-50)         | 835        | 34          | 96.4           | 2.6            | 1.0            |
|                       | 2May-6June | SMOG22              | 5.8  | 4.6    | 28.6  | 48.1 (22-66) | 0                   | 16.6 (7-32)         | 821        | 62          | 99.9           | 0.1            | 0.0            |
|                       |            | SMOG28              | 6.6  | 5.2    | 29.8  | 45.0 (22-61) | 0                   | 16.8 (7-32)         | 821        | 53          | 99.9           | 0.1            | 0.0            |
| DEDJTR                | 1-4May     | SMOG6               | 6.5  | 5.7    | 27.6  | 39.0 (23-72) | 5.6                 | 19.2 (14-28)        | 72         | 47          | 98.6           | 1.4            | 0.0            |
|                       | 1May-6June | SMOG7               | 3.9  | 2.5    | 39.3  | 60.6 (24-85) | 26.0                | 12.9 (6-29)         | 823        | 72          | 99.6           | 0.4            | 0.0            |
|                       |            | E-sampler4          | 4.4  | 3.6    | 38.2  |              | NA                  |                     |            |             | 99.7           | 0.3            | 0.0            |
|                       |            | E-sampler5          | 4.4  | 3.6    | 38.5  |              | NA                  |                     |            |             | 99.6           | 0.4            | 0.0            |
| Winton                | 1-3May     | SMOG14 <sup>‡</sup> | 30.8 | 24.3   | 131.1 | 29.7 (16-41) |                     | 21.7 (14-35)        | 34         |             |                |                |                |
| Wetlands              | 1May-6June | SMOG20              | 6.6  | 4.7    | 39.2  | 47.9 (19-76) | 3.4                 | 14.8 (6-35)         | 836        | 58          | 98.3           | 1.7            | 0.0            |
| Benalla               | 1May-6June | SMOG12              | 7.0  | 5.0    | 48.0  | 46.8 (22-63) | 0                   | 16.1 (10-28)        | 855        | 53          | 98.8           | 1.2            | 0.0            |
|                       |            | SMOG13              | 7.3  | 5.1    | 73.7  | 45.2 (22-61) | 0                   | 16.4 (11-28)        | 856        | 53          | 98.9           | 1.1            | 0.0            |
| Benalla (in-<br>side) | 1May-6June | SMOG2               | 4.7  | 3.3    | 41.7  | 32.2 (21-44) | 0                   | 21.9 (15-28)        | 867        | 76          | 99.9           | 0.1            | 0.0            |
|                       |            | SMOG4               | 5.2  | 3.8    | 79.2  | 31.0 (23-40) | 0                   | 22.1 (15-28)        | 856        | 71          | 99.9           | 0.1            | 0.0            |
| Ovens                 | 1May-6June | SMOG16              | 6.8  | 5.2    | 48.1  | 40.6 (23-55) | 0                   | 19.7 (13-28)        | 829        | 56          | 97.3           | 2.7            | 0.0            |
|                       |            | SMOG17              | 6.3  | 4.7    | 44.3  | 42.9 (24-57) | 0                   | 19.6 (12-28)        | 828        | 60          | 97.6           | 2.4            | 0.0            |

|                 |            |        |      |     |       |              |     |             |     |    |      |     |     |
|-----------------|------------|--------|------|-----|-------|--------------|-----|-------------|-----|----|------|-----|-----|
| Bee-<br>chworth | 1May-6June | SMOG18 | 9.6  | 7.7 | 57.1  | 53.3 (21-72) | 0.6 | 14.4 (6-35) | 838 | 32 | 95.9 | 3.1 | 1.0 |
|                 |            | SMOG19 | 9.7  | 7.9 | 56.0  | 50.3 (15-70) | 0   | 15.2 (6-41) | 833 | 32 | 95.6 | 3.4 | 1.1 |
| Mansfield       | 1May-6June | SMOG8  | 11.1 | 8.1 | 79.5  | 49.1 (20-66) | 0   | 15.0 (6-28) | 867 | 37 | 91.8 | 7.3 | 0.9 |
|                 |            | SMOG9  | 10.7 | 7.5 | 109.5 | 46.3 (20-62) | 0   | 14.7 (6-28) | 855 | 38 | 92.6 | 6.6 | 0.8 |
| Tallangatta     | 1May-6June | SMOG10 | 9.6  | 6.6 | 60.9  | 46.3 (23-70) | 0   | 16.6 (7-28) | 855 | 44 | 94.3 | 4.9 | 0.8 |
|                 |            | SMOG11 | 10.2 | 7.1 | 63.5  | 48.4 (22-73) | 0.9 | 16.2 (7-28) | 855 | 39 | 93.5 | 5.7 | 0.8 |

\* Issue with SMOG unit (measured PM<sub>2.5</sub> concentrations much lower than collocated SMOG unit)

# Issue with SMOG unit (likely insect in sensor chamber causing elevated PM readings)

**Table S5.** Summary statistics of hourly PM<sub>2.5</sub> concentrations measured in Northeast Victoria in 2018/2019.Good AQ PM<sub>2.5</sub><25 µg m<sup>-3</sup>, Fair AQ PM<sub>2.5</sub>=25-50 µg m<sup>-3</sup>, Poor AQ>50 µg m<sup>-3</sup>)

| Location    | Date                               | Units      | Mean | Median | Max  | RH (%)       | %obs when<br>RH>70% | Temperature<br>(°C) | N<br>(hrs) | <LOD<br>(%) | Good<br>AQ<br>(%) | Fair<br>AQ<br>(%) | Poor<br>AQ<br>(%) |
|-------------|------------------------------------|------------|------|--------|------|--------------|---------------------|---------------------|------------|-------------|-------------------|-------------------|-------------------|
| Alexandra   | 1Dec18-20Feb19                     | SMOG1      | 2.8  | 1.2    | 75.3 | 36.9 (7-83)  | 2.1                 | 31.1 (8-62)         | 1420       | 89          | 98.3              | 1.1               | 0.6               |
|             | 5Mar19-16Jun19                     | SMOG16     | 10.7 | 3.4    | 125  | 57.5 (10-90) | 25.5                | 17.1 (6-45)         | 2105       | 58          | 86.8              | 9.1               | 4.1               |
|             |                                    | E-sampler4 | 7.6  | 2.9    | 164  |              | NA                  |                     |            |             | 92.6              | 4.6               | 2.8               |
|             |                                    | Fidas      | 12.4 | 6.6    | 173  |              | NA                  |                     |            |             | 88.2              | 7.4               | 4.4               |
|             |                                    | Fidas_ols  | 6.8  | 3.6    | 95.4 |              | NA                  |                     |            |             | 94.7              | 4.3               | 0.9               |
| Benalla     | 7Feb19-16Jun19                     | SMOG6      | 5.6  | 1.8    | 175  | 43.4 (8-76)  | 1.5                 | 19.7 (6-46)         | 3065       | 77          | 94.6              | 2.3               | 3.1               |
|             | 7Feb19-16Jun19                     | SMOG15     | 7.1  | 2.1    | 196  | 45.3 (11-75) | 1.3                 | 20.1 (7-44)         | 3093       | 73          | 94.1              | 2.7               | 3.3               |
| Mansfield   | 17Jan19-16Jun19                    | SMOG2      | 8.5  | 2.5    | 220  | 45.5 (5-85)  | 7.0                 | 21.5 (6-52)         | 3456       | 69          | 91.5              | 5.0               | 3.5               |
|             | 17Jan19-16Jun19                    | SMOG14     | 8.8  | 2.4    | 207  | 45.3 (7-94)  | 10.0                | 21.3 (6-51)         | 3491       | 70          | 91.4              | 4.8               | 3.8               |
| Milawa      | 24Dec18-14Feb19/<br>5Apr19-11May19 | SMOG3      | 3.6  | 1.5    | 134  | 41.8 (3-100) | 12.8                | 29.0 (6-58)         | 2123       | 83          | 98.2              | 1.1               | 0.7               |
|             | 24Dec18-24Apr19                    | SMOG41     | 5.6  | 1.7    | 158  | 46.2 (7-100) | 18.9                | 27.0 (6-54)         | 2880       | 80          | 94.6              | 3.0               | 2.4               |
| Ovens       | 13Feb19-4Jun19                     | SMOG9      | 5.6  | 3.5    | 69.1 | 54.5 (2-100) | 42.0                | 18.6 (6-48)         | 2342       | 63          | 95.2              | 3.5               | 1.3               |
|             | 13Feb19-4Jun19                     | SMOG26     | 5.3  | 3.4    | 68.2 | 60.3 (4-100) | 54.6                | 18.7 (6-48)         | 2316       | 64          | 96.1              | 3.0               | 0.9               |
| Tallangatta | 1Dec19-16Jun19                     | SMOG7      | 5.1  | 2.1    | 213  | 49.7 (10-99) | 20.0                | 22.7 (6-50)         | 4292       | 75          | 95.5              | 3.2               | 1.3               |
|             | 1Dec19-16Jun19                     | SMOG10     | 5.5  | 2.3    | 159  | 42.5 (2-81)  | 3.3                 | 24.9 (6-64)         | 4633       | 73          | 95.3              | 3.4               | 1.4               |

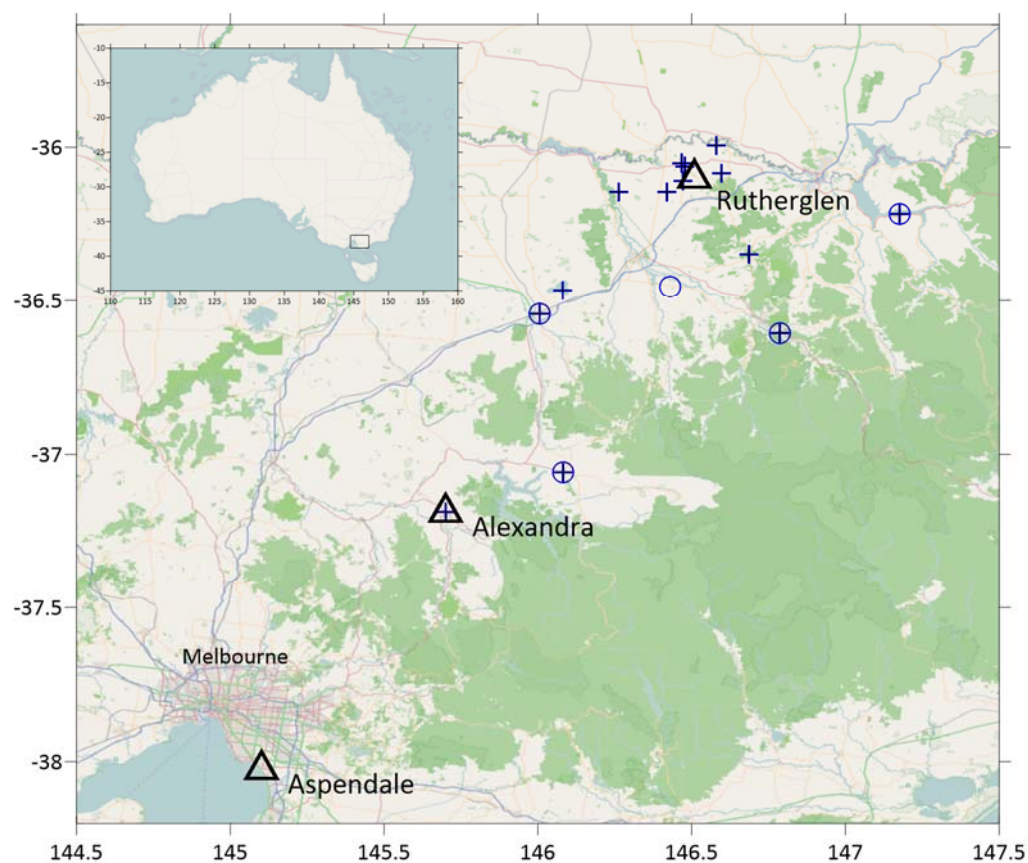

**Figure S1.** Location of the field-based measurement sites:  $\Delta$  represent sites with collocated reference instruments;  $+$  represent North-east Victoria measurement sites (sampling period of May-June 2018),  $\circ$  represent North-east Victoria measurement sites (sampling period Nov 2018-June 2019)

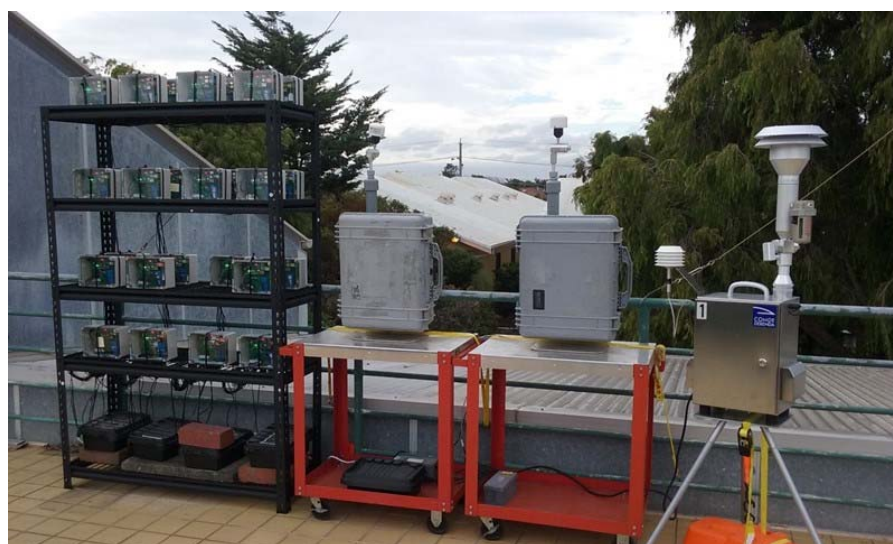

**Figure S2.** Set-up for intercomparison between SMOG units and E-samplers fitted with a  $PM_{2.5}$  size selective inlet.

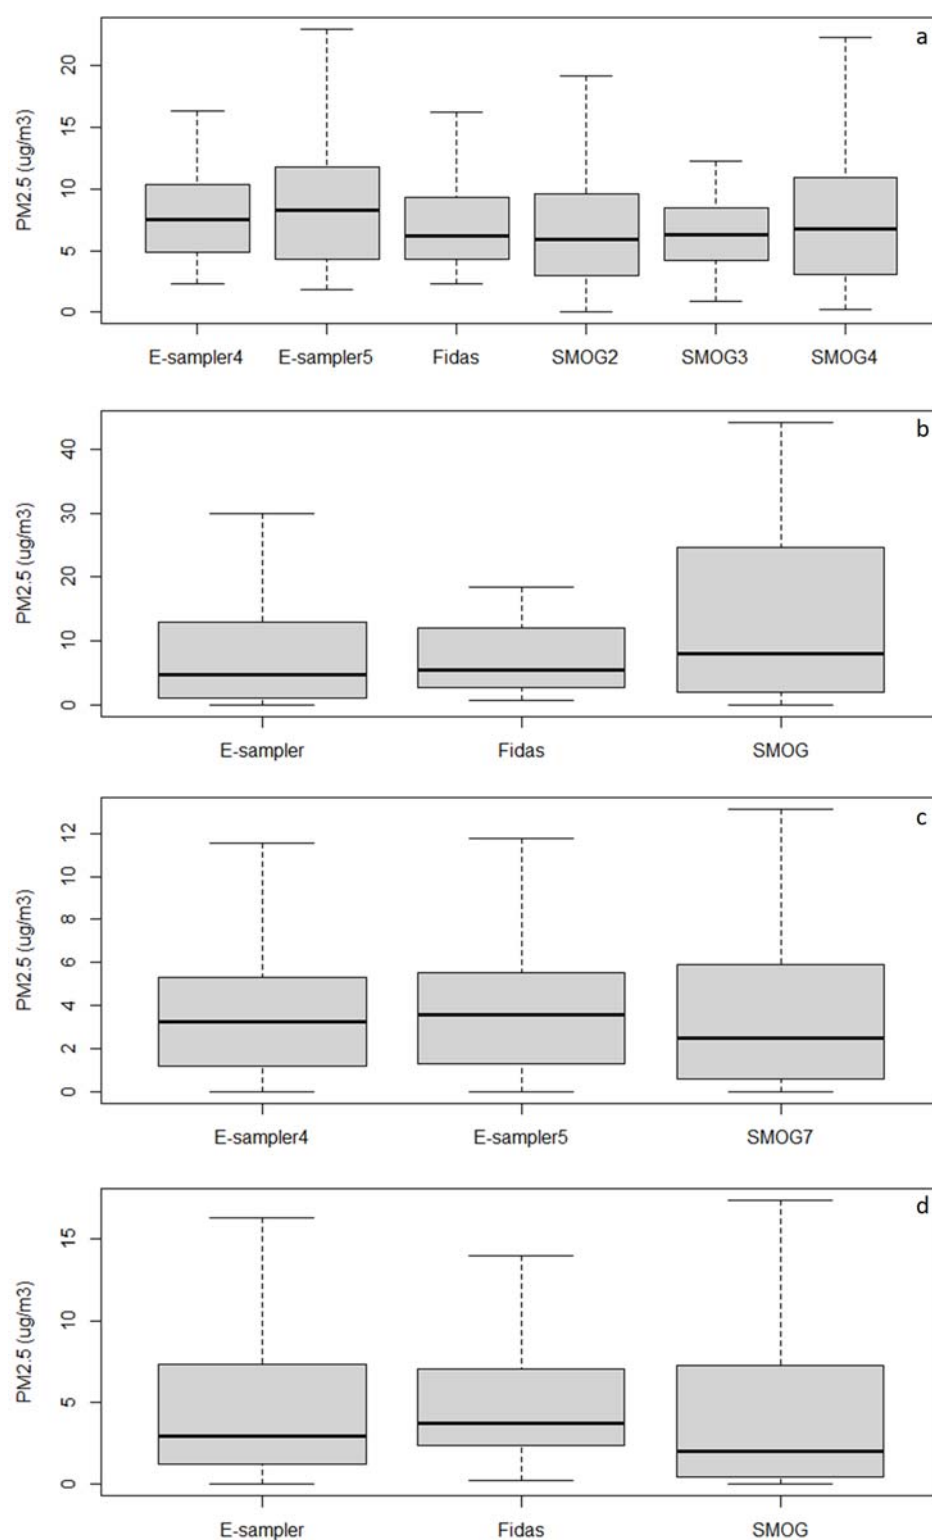

**Figure S3.** Boxplots for PM<sub>2.5</sub> hourly concentrations at (a) Aspendale Autumn, (b) Aspendale winter, (c) Rutherglen (Victoria) and (d) Alexandra (Victoria). Whiskers denote the 10th and 90th percentiles



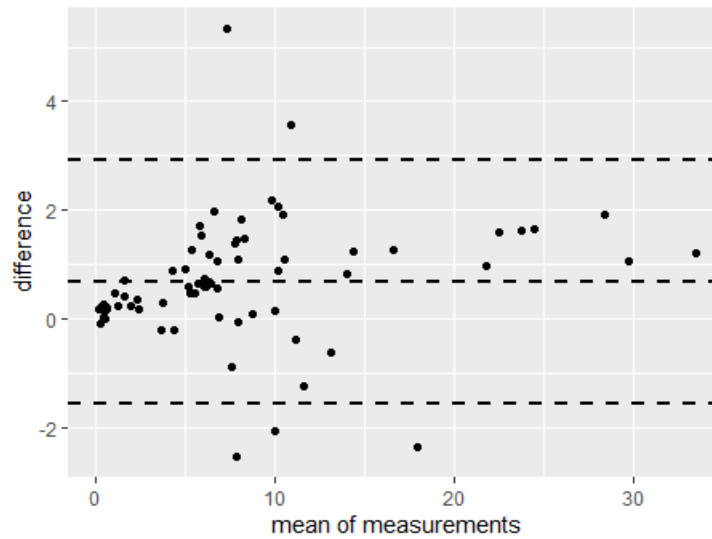

**Figure S4.** Bland-Altman plot of the agreement between PM<sub>2.5</sub> concentrations measured by two SMOG units during autumn at Aspendale.

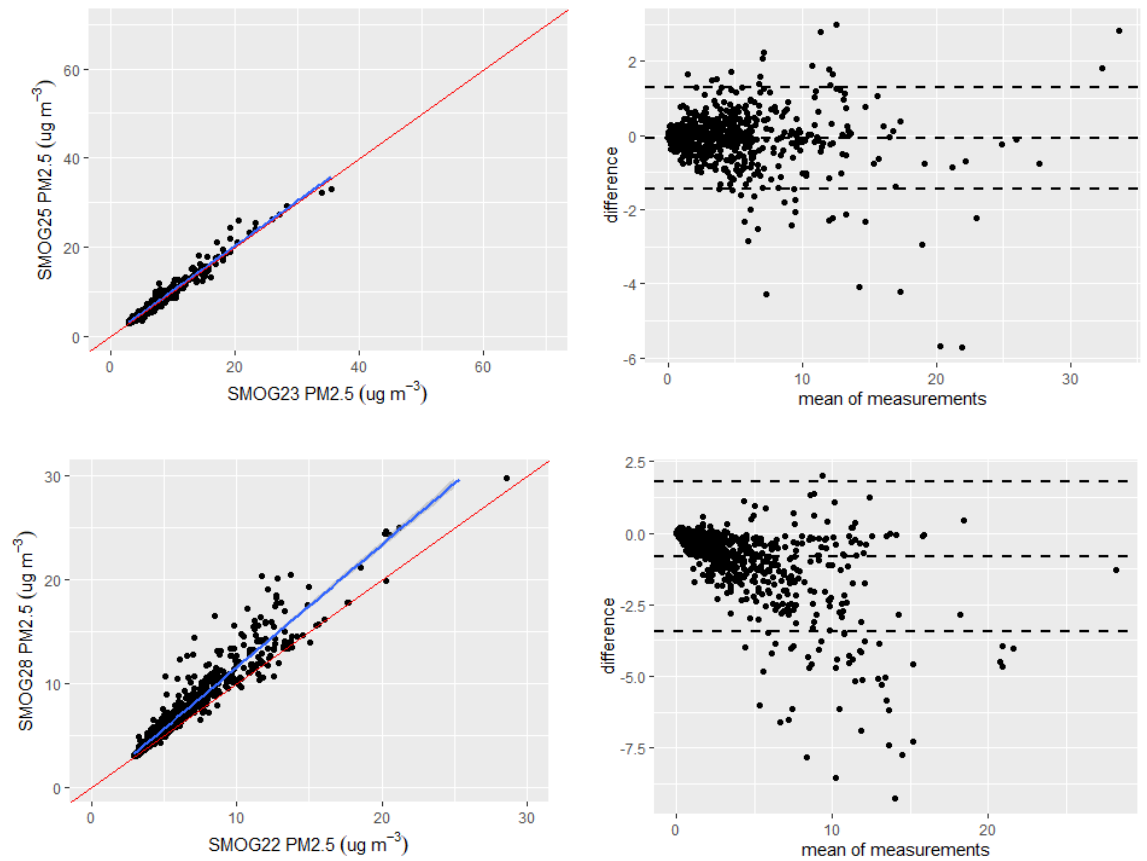

**Figure S5.** Scatter plot and Bland-Altman plots of the agreement between PM<sub>2.5</sub> concentrations measured by two SMOG units in Northeast Victoria.

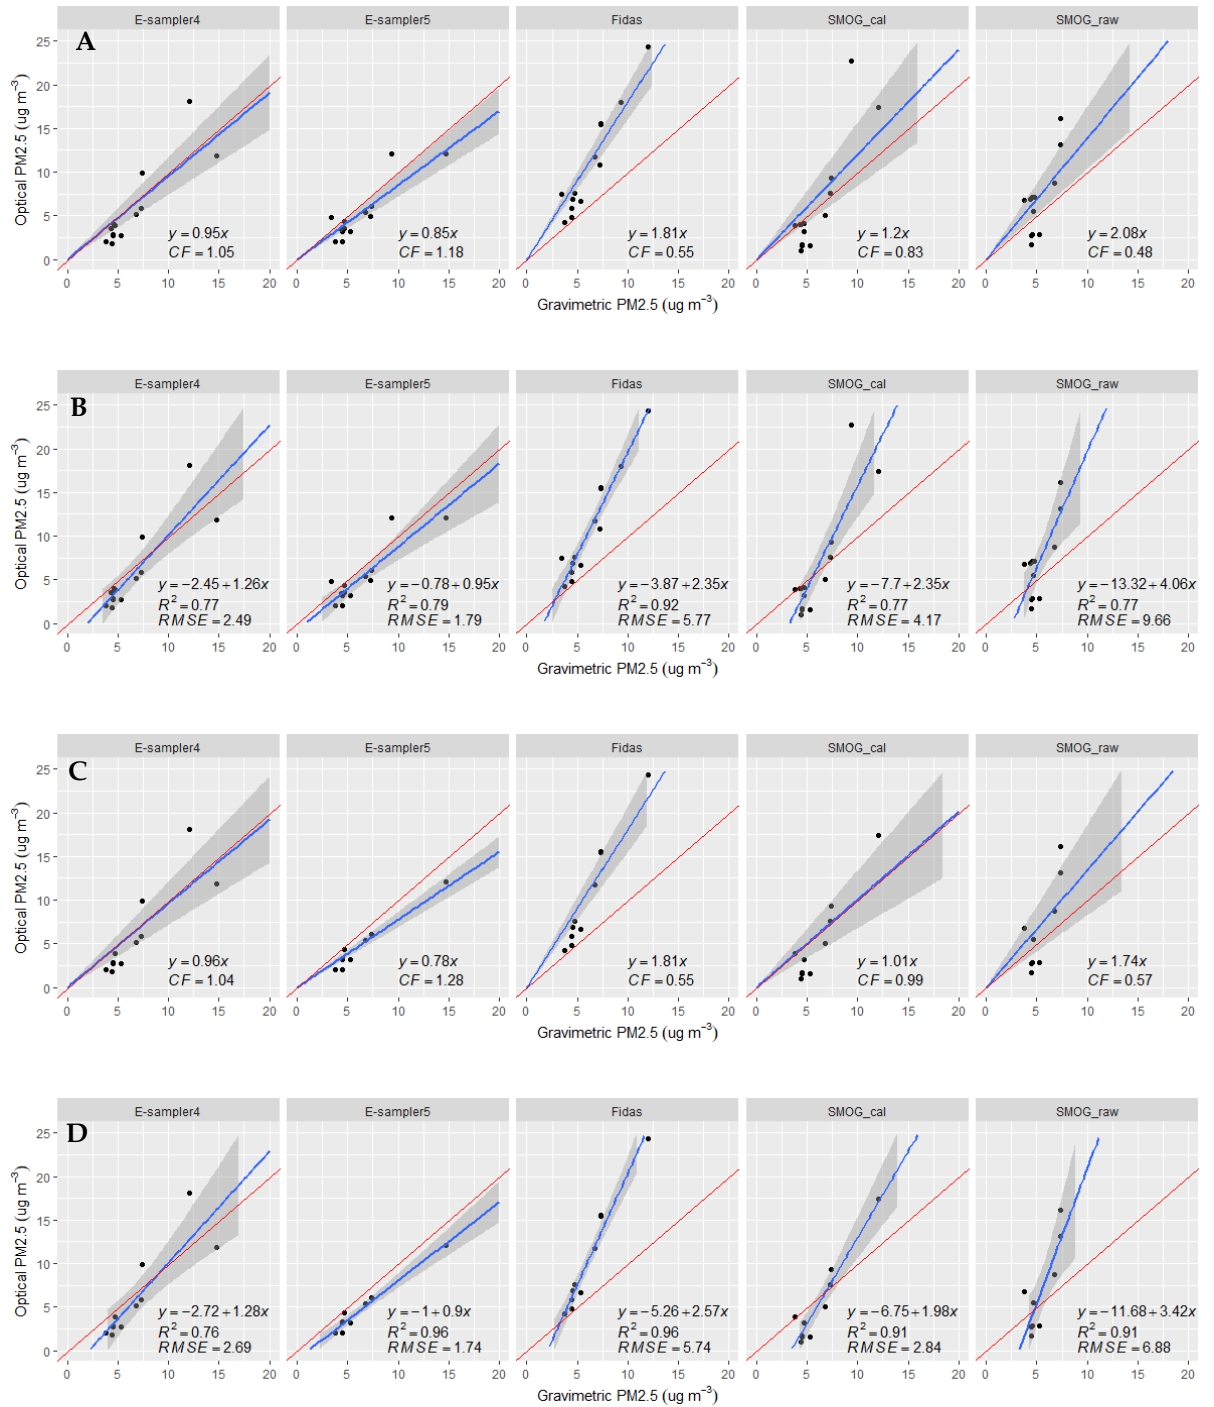

**Figure S6.** Linear regression analysis of optical measurements vs gravimetric mass measurements. A Regression with zero intercept for entire data set (CF represents the calibration factor = 1/slope); B Regression with non-zero intercept for entire data set; C Regression with zero intercept for Alexandra data set; D Regression with non-zero intercept for Alexandra data set. Blue lines show linear least-squares fit; red line represents 1:1 line.

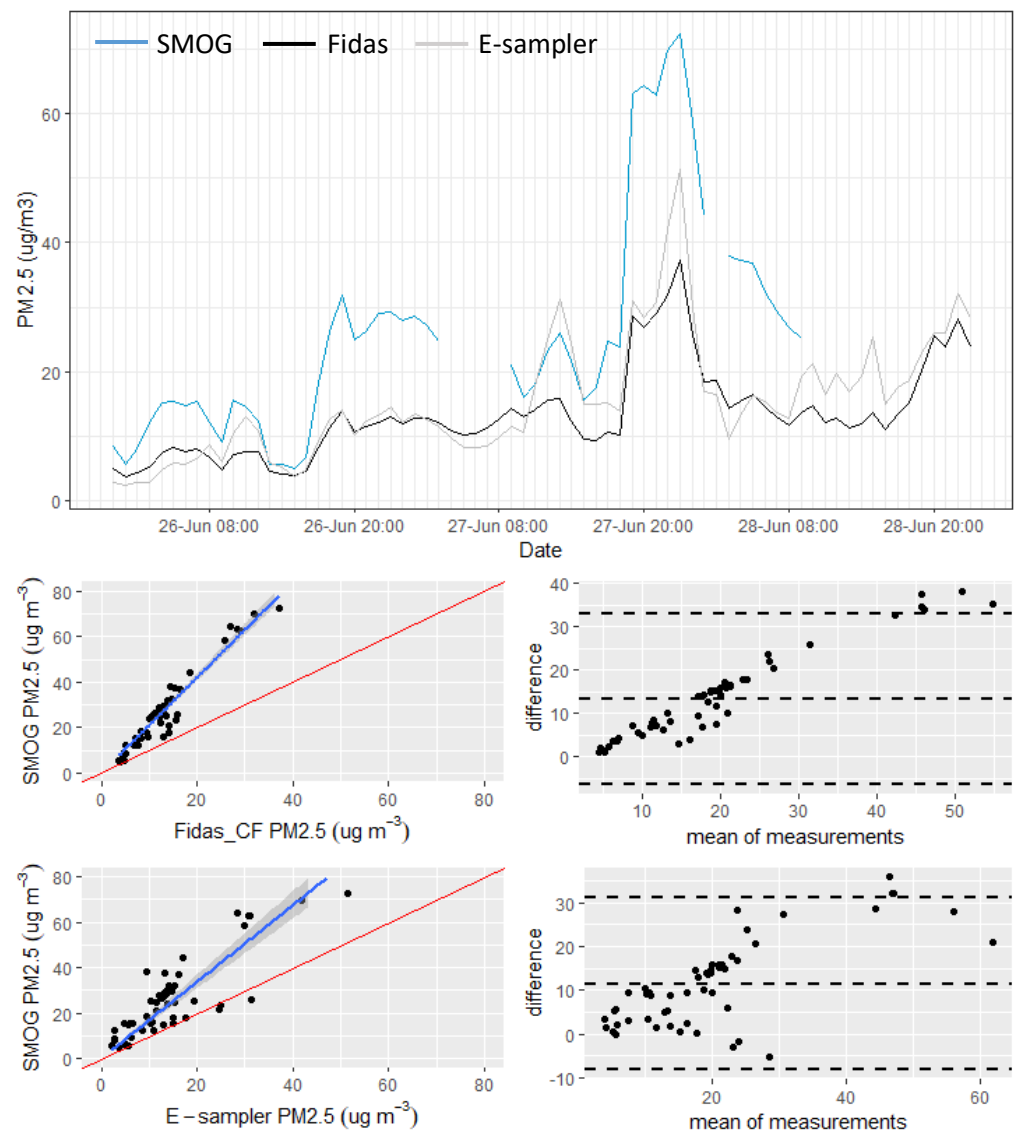

Figure S7. High particle event in winter at Aspendale.

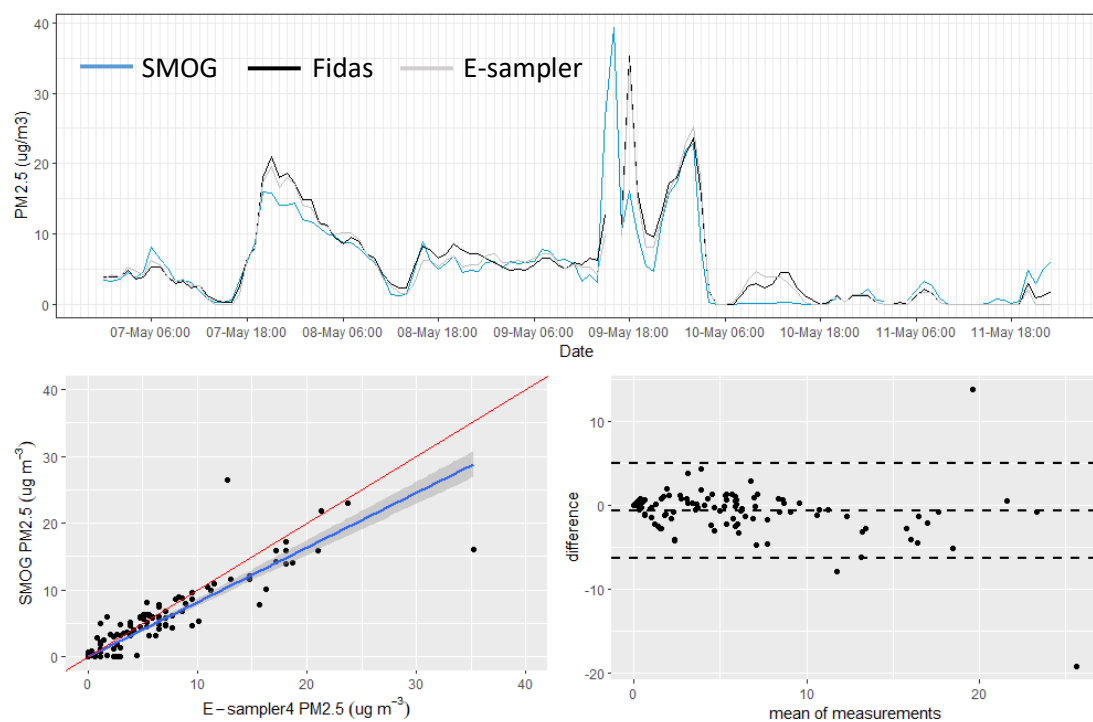

Figure S8. High particle event in autumn at Rutherglen.

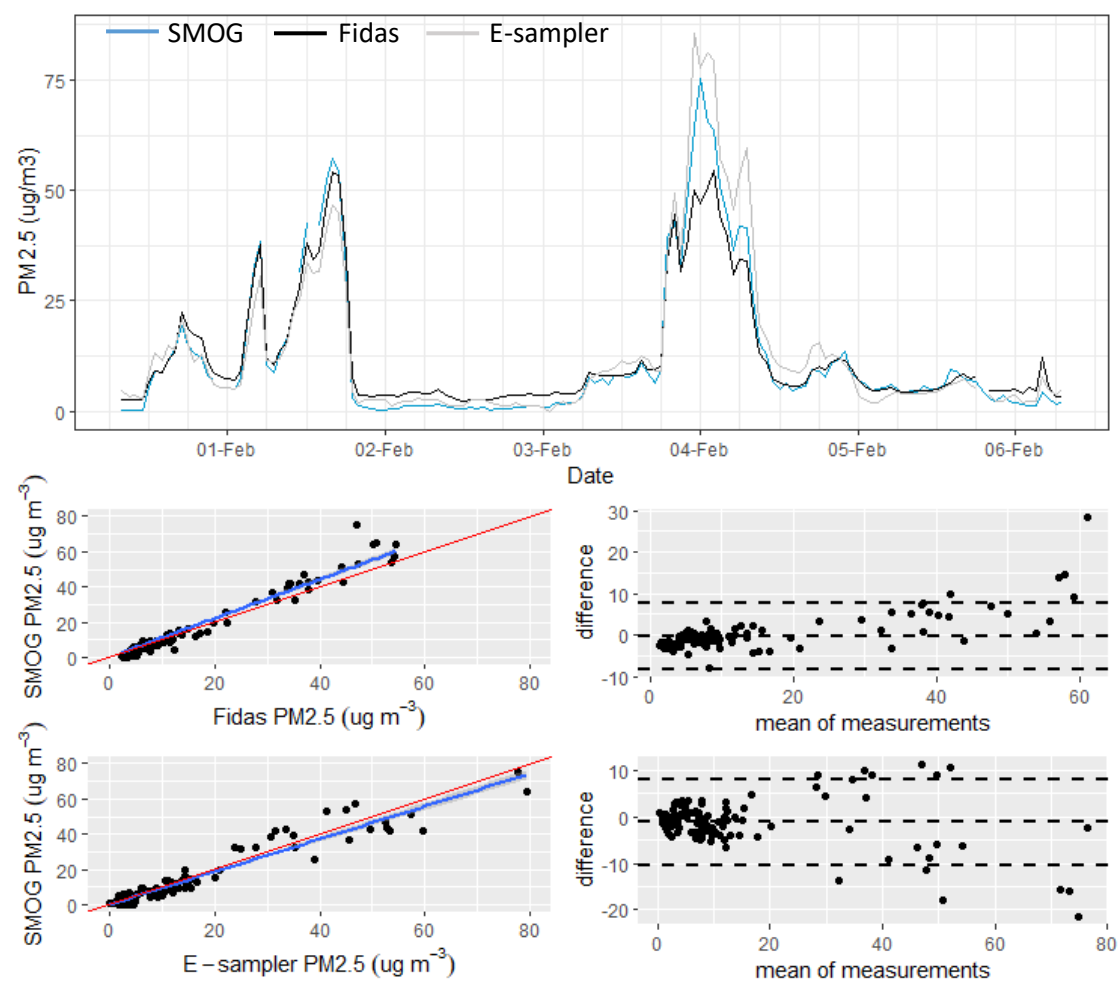

Figure S9. High particle event in summer at Alexandra

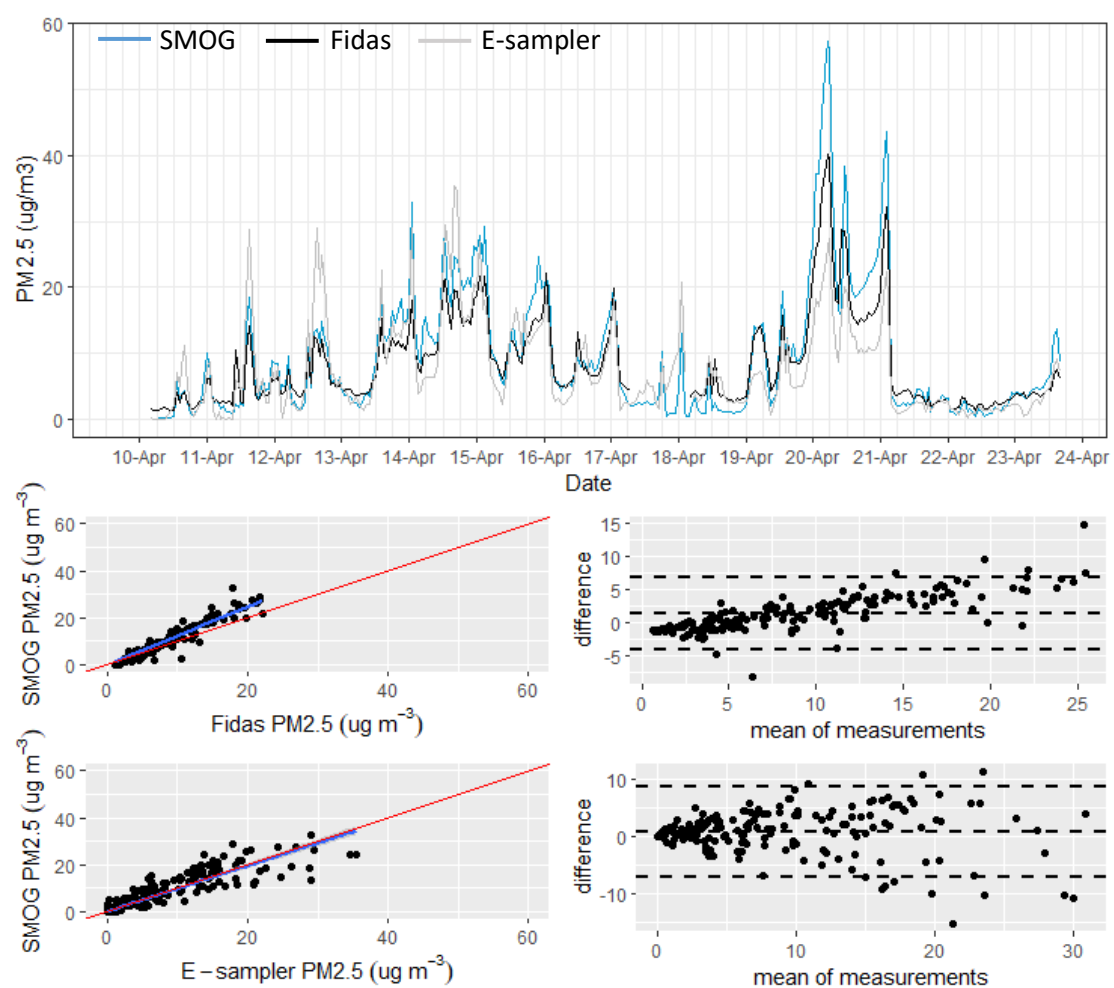

**Figure S10.** High particle event in autumn at Alexandra

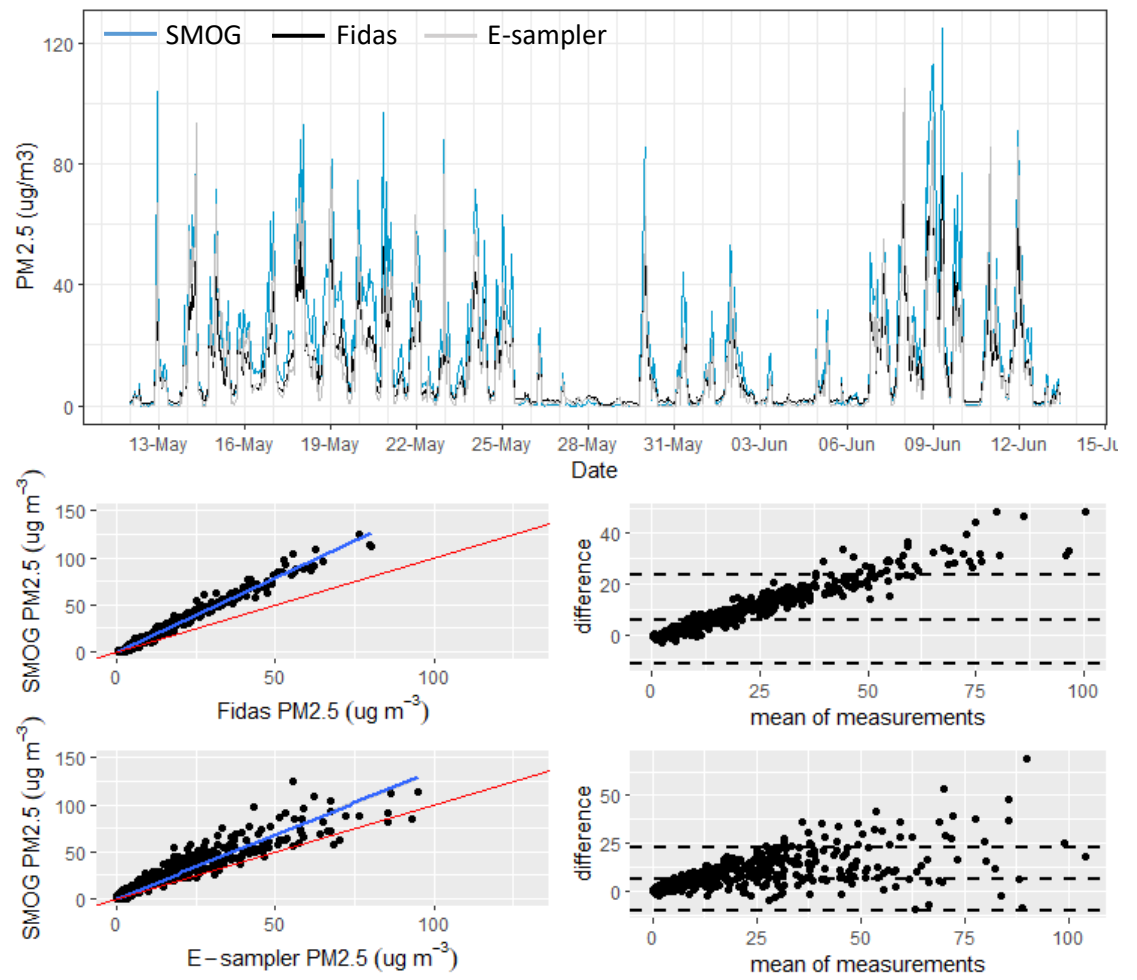

**Figure S11.** High particle event in winter at Alexandra
